# Supplementary material for: Measures of possible allostatic load in comorbid cocaine and alcohol use disorder: Brain white matter integrity, telomere length, and anti-saccade performance
Source: PubMed Central journal article supplement (PMC6326479; doi:10.1371/journal.pone.0199729), 2019-01-09
Supplement: pone.0199729.s003.pdf [file pone.0199729.s003.pdf]

**S3 File.** Code, outcome parameters, and graphical information for the penalized regression using the elastic net via the R packages glmnet and selectiveInference.

```
# create matrix from x variables (predictors) and standardize
x_matrix_tmp <- data.frame(data1$age, data1$v_cn_diff, data1$telo, data1$coke_yrs, data1$alc_yrs)
# subset the dataframe
x_matrix <- data.matrix(x_matrix_tmp) # convert subsetted data frame to matrix
xdata.z <- scale(x_matrix, center=T, scale=T)

# create vector for y variable (dti, dependent) and standardize
y_vector <- as.vector(data1$rd_coke)
ydata.z <- scale(y_vector, center=T, scale=T)

# run elastic net (lasso/ridge special case anchors) with LOOCV as per Finch and Finch article
glmnet1.cv <- cv.glmnet(xdata.z,ydata.z, standardize = FALSE, type.measure="mse", nfolds=22)

# obtain lambda with min MSE
glmnet1.cv$lambda.min
[1] 0.01899326

# obtain coefficients from model with optimal lambda value
coef(glmnet1.cv,s = "lambda.min")

      1
(Intercept)      -8.245236e-16
data1.age         3.754791e-01
data1.et_diff     3.279492e-01
data1.telo        -3.307578e-01
data1.coke_yrs    6.068837e-01
data1.alc_yrs     7.078269e-02

# obtain r-squared from best fitted model
r2 <- glmnet1.cv$glmnet.fit$dev.ratio[which(glmnet1.cv$glmnet.fit$lambda == glmnet1.cv$lambda.min)]
r2
[1] 0.78524

# examine relationship between coefficient values and model fit (as R-squared)
glmnet2.z <- glmnet(xdata.z,ydata.z,alpha=1, standardize=FALSE, nlambda=100)
plot(glmnet2.z, xvar="dev", label=TRUE, ylab=c("Regression Coefficient"), xlab=c("R Squared"))
```

```
# use selectiveinference package for covariance test estimate
# of the null hypothesis = no relationship with the dependent variable

lasso.sigma <- estimateSigma(xdata.z,ydata.z, intercept=FALSE, standardize=FALSE)
lasso.beta <- coef(glmnet2.z, glmnet1.cv$lambda.min )[-1]
lasso.inference <- fixedLassoInf(xdata.z,ydata.z, lasso.beta, glmnet1.cv$lambda.min, sigma=lasso.sigma$sigmahat)
```

```
Call:
fixedLassoInf(x = xdata.z, y = ydata.z, beta = lasso.beta, lambda = glmnet1.cv$lambda.min,
  sigma = lasso.sigma$sigmahat)
```

Standard deviation of noise (specified or estimated) sigma = 0.546

Testing results at lambda = 0.019, with alpha = 0.100

| Var | Coef   | Z-score | P-value | LowCI  | UpCI   | LowTailArea | UpTailArea |
|-----|--------|---------|---------|--------|--------|-------------|------------|
| 1   | 0.375  | 2.862   | 0.004   | 0.148  | 0.595  | 0.048       | 0.050      |
| 2   | 0.327  | 2.453   | 0.014   | 0.088  | 0.547  | 0.049       | 0.049      |
| 3   | -0.330 | -2.363  | 0.047   | -0.560 | -0.004 | 0.049       | 0.049      |
| 4   | 0.606  | 3.884   | 0.000   | 0.352  | 1.048  | 0.050       | 0.049      |
| 5   | 0.075  | 0.540   | 0.592   | -0.721 | 0.280  | 0.050       | 0.049      |

Var labels: 1. data1.age 2. data1.et\_diff 3. data1.telo 4. data1.coke\_yrs 5. data1.alc\_yrs

```
sink() # write output
```

```
# examine fit parameters (variance) across the range of lambda from glmnet fit
> print(glmnet1.cv$glmnet.fit)
```

```
Call: glmnet(x = xdata.z, y = ydata.z, standardize = FALSE)
```

|      | Df | %Dev    | Lambda   |
|------|----|---------|----------|
| [1,] | 0  | 0.00000 | 0.698600 |
| [2,] | 1  | 0.09095 | 0.636600 |
| [3,] | 1  | 0.16650 | 0.580000 |
| [4,] | 1  | 0.22920 | 0.528500 |
| [5,] | 1  | 0.28120 | 0.481500 |
| [6,] | 1  | 0.32440 | 0.438800 |
| [7,] | 1  | 0.36030 | 0.399800 |
| [8,] | 1  | 0.39010 | 0.364300 |

[9,] 2 0.42360 0.331900  
[10,] 2 0.45490 0.302400  
[11,] 2 0.48090 0.275600  
[12,] 2 0.50250 0.251100  
[13,] 3 0.52200 0.228800  
[14,] 4 0.56220 0.208500  
[15,] 4 0.59970 0.189900  
[16,] 4 0.63080 0.173100  
[17,] 4 0.65670 0.157700  
[18,] 4 0.67810 0.143700  
[19,] 4 0.69600 0.130900  
[20,] 4 0.71080 0.119300  
[21,] 4 0.72300 0.108700  
[22,] 4 0.73320 0.099030  
[23,] 4 0.74170 0.090230  
[24,] 4 0.74870 0.082220  
[25,] 5 0.75520 0.074910  
[26,] 5 0.76060 0.068260  
[27,] 5 0.76510 0.062190  
[28,] 5 0.76890 0.056670  
[29,] 5 0.77200 0.051630  
[30,] 5 0.77460 0.047050  
[31,] 5 0.77670 0.042870  
[32,] 5 0.77850 0.039060  
[33,] 5 0.78000 0.035590  
[34,] 5 0.78120 0.032430  
[35,] 5 0.78220 0.029550  
[36,] 5 0.78310 0.026920  
[37,] 5 0.78380 0.024530  
[38,] 5 0.78440 0.022350  
[39,] 5 0.78480 0.020370  
[40,] 5 0.78520 0.018560  
[41,] 5 0.78560 0.016910  
[42,] 5 0.78590 0.015410  
[43,] 5 0.78610 0.014040  
[44,] 5 0.78630 0.012790  
[45,] 5 0.78640 0.011650  
[46,] 5 0.78660 0.010620  
[47,] 5 0.78670 0.009675  
[48,] 5 0.78680 0.008816  
[49,] 5 0.78680 0.008033

```
[50,] 5 0.78690 0.007319
[51,] 5 0.78700 0.006669
[52,] 5 0.78700 0.006076
[53,] 5 0.78700 0.005537
[54,] 5 0.78710 0.005045
[55,] 5 0.78710 0.004597
[56,] 5 0.78710 0.004188
[57,] 5 0.78710 0.003816
[58,] 5 0.78710 0.003477
[59,] 5 0.78710 0.003168
[60,] 5 0.78720 0.002887
[61,] 5 0.78720 0.002630
[62,] 5 0.78720 0.002397
```

```
glmnet1.cv$lambda.min # obtain lambda with min MSE
[1] 0.0190806
```

```
> # obtain r-squared from best fitted model
> r2 <- glmnet1.cv$glmnet.fit$dev.ratio[which(glmnet1.cv$glmnet.fit$lambda == glmnet1.cv$lambda.min)]
> r2
[1] 0.7852
```

```
> RMSE <- sqrt(glmnet1.cv$lambda.min)
> RMSE
[1] 0.130031
```

```
> plot(glmnet1.cv)
```

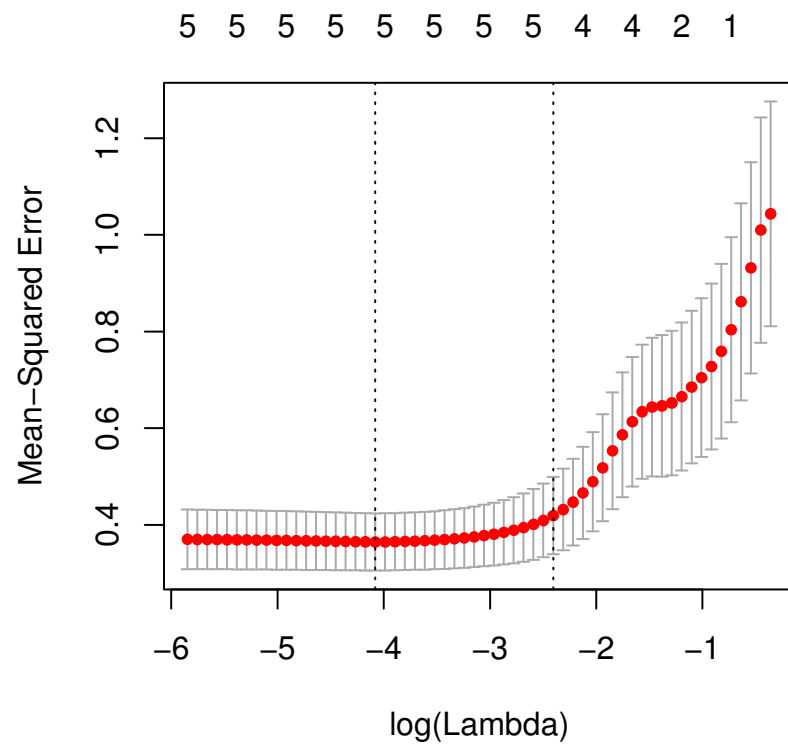

```
> plot(glmnet1.cv$glmnet.fit, xdata.z = "dev", label = TRUE)
```

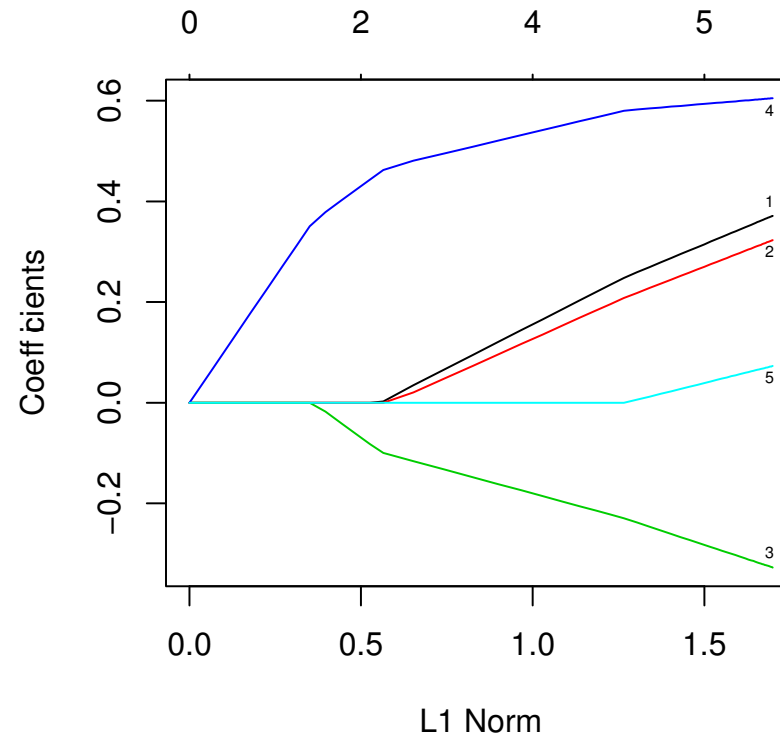

1. Age
2. Anti-saccade (drift rate difference: cocaine vs. non-drug)
3. Telomere length
4. Years of cocaine use
5. Years of alcohol use

```
> plot(glmnet2.z, xvar="dev", label=TRUE, ylab=c("Regression Coefficient (Lasso)"), xlab=c("R Squared"))
```

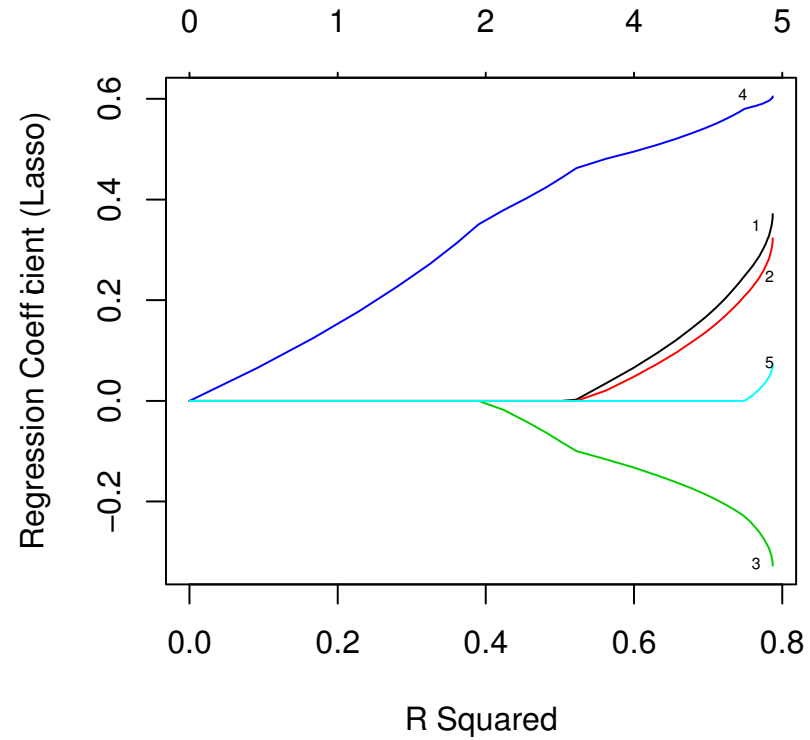

1. Age
2. Anti-saccade (drift rate difference: cocaine vs. non-drug)
3. Telomere length
4. Years of cocaine use
5. Years of alcohol use
