# Supplementary material for: Measures of possible allostatic load in comorbid cocaine and alcohol use disorder: Brain white matter integrity, telomere length, and anti-saccade performance
Source: PubMed Central journal article supplement (PMC6326479; doi:10.1371/journal.pone.0199729), 2019-01-09
Supplement: pone.0199729.s004.pdf [file pone.0199729.s004.pdf]

**S1 Table.** Details for identified significant white matter (WM) clusters (number and percent) with location of tract label, for FA, MD, and RD values from the TBSS analyses regressing WM metrics and years of cocaine use, controlling for years of alcohol use, age, sex, and education.

| <b>Tract Label</b> | <b>Total Tract Volume (voxels)</b> | <b>FA # sig voxels</b> | <b>FA % sig voxels</b> | <b>MD # sig voxels</b> | <b>MD % sig voxels</b> | <b>RD # sig voxels</b> | <b>RD % sig voxels</b> | <b>Tract Label Key</b>           |
|--------------------|------------------------------------|------------------------|------------------------|------------------------|------------------------|------------------------|------------------------|----------------------------------|
| 1                  | 15644                              | 0                      | 0                      | 0                      | 0.00                   | 0                      | 0                      | Middle cerebellar peduncle       |
| 2                  | 1500                               | 0                      | 0                      | 0                      | 0.00                   | 0                      | 0                      | Pontine crossing tract           |
| 3                  | 8851                               | 4536                   | 51.25                  | 868                    | 9.81                   | 3407                   | 38.49                  | Genu of corpus callosum          |
| 4                  | 13711                              | 6628                   | 48.34                  | 452                    | 3.30                   | 6370                   | 46.46                  | Body of corpus callosum          |
| 5                  | 12729                              | 2506                   | 19.69                  | 185                    | 1.45                   | 4578                   | 35.97                  | Splenium of corpus callosum      |
| 6                  | 659                                | 0                      | 0                      | 0                      | 0.00                   | 0                      | 0                      | Fornix (column and body)         |
| 7                  | 1362                               | 0                      | 0                      | 0                      | 0.00                   | 0                      | 0                      | Corticospinal tract R            |
| 8                  | 1370                               | 0                      | 0                      | 0                      | 0.00                   | 0                      | 0                      | Corticospinal tract L            |
| 9                  | 690                                | 0                      | 0                      | 0                      | 0.00                   | 0                      | 0                      | Medial lemniscus R               |
| 10                 | 699                                | 0                      | 0                      | 0                      | 0.00                   | 0                      | 0                      | Medial lemniscus L               |
| 11                 | 968                                | 0                      | 0                      | 0                      | 0.00                   | 0                      | 0                      | Inf. cerebellar peduncle R       |
| 12                 | 968                                | 0                      | 0                      | 0                      | 0.00                   | 0                      | 0                      | Inf. cerebellar peduncle L       |
| 13                 | 992                                | 0                      | 0                      | 0                      | 0.00                   | 0                      | 0                      | Sup. cerebellar peduncle R       |
| 14                 | 992                                | 0                      | 0                      | 0                      | 0.00                   | 0                      | 0                      | Sup. cerebellar peduncle L       |
| 15                 | 2278                               | 0                      | 0                      | 0                      | 0.00                   | 0                      | 0                      | Cerebral peduncle R              |
| 16                 | 2278                               | 0                      | 0                      | 0                      | 0.00                   | 0                      | 0                      | Cerebral peduncle L              |
| 17                 | 3138                               | 0                      | 0                      | 1156                   | 36.84                  | 1264                   | 0                      | Ant. limb of internal capsule R  |
| 18                 | 3018                               | 0                      | 0                      | 0                      | 0.00                   | 362                    | 11.99                  | Ant. limb of internal capsule L  |
| 19                 | 3754                               | 0                      | 0                      | 17                     | 0.45                   | 1431                   | 38.12                  | Post. limb of internal capsule R |

|    |      |      |   |      |       |      |       |                                                                                        |
|----|------|------|---|------|-------|------|-------|----------------------------------------------------------------------------------------|
| 20 | 3752 | 0    | 0 | 0    | 0.00  | 0    | 0     | Post. limb of internal capsule L                                                       |
|    |      |      | 0 |      |       |      |       |                                                                                        |
| 21 | 2515 | 2    |   | 51   | 2.03  | 446  | 17.73 | Retrolenticular part of internal capsule R                                             |
|    |      |      | 0 |      |       |      |       |                                                                                        |
| 22 | 2469 | 0    |   | 0    | 0.00  | 15   | 0.61  | Retrolenticular part of internal capsule L                                             |
| 23 | 6849 | 1158 | 0 | 4217 | 61.57 | 4657 | 68.00 | Ant. corona radiata R                                                                  |
| 24 | 6852 | 1906 | 0 | 0    | 0.00  | 4280 | 62.46 | Ant. corona radiata L                                                                  |
| 25 | 7500 | 1336 | 0 | 3785 | 50.47 | 5372 | 71.63 | Sup. corona radiata R                                                                  |
| 26 | 7508 | 2062 | 0 | 0    | 0.00  | 4067 | 54.17 | Sup. corona radiata L                                                                  |
| 27 | 3728 | 1761 | 0 | 1996 | 53.54 | 2929 | 78.57 | Post. corona radiata R                                                                 |
| 28 | 3714 | 376  | 0 | 0    | 0.00  | 1324 | 35.65 | Post. corona radiata L                                                                 |
|    |      |      | 0 |      |       |      |       |                                                                                        |
| 29 | 3972 | 255  |   | 2206 | 55.54 | 3320 | 83.59 | Post. thalamic radiation (include optic radiation) R                                   |
|    |      |      | 0 |      |       |      |       |                                                                                        |
| 30 | 3978 | 0    |   | 0    | 0.00  | 1816 | 45.65 | Post. thalamic radiation (include optic radiation) L                                   |
|    |      |      | 0 |      |       |      |       |                                                                                        |
| 31 | 2228 | 0    |   | 285  | 12.79 | 1545 | 69.34 | Sagittal stratum (inf. longitudinal fasciculus and inf. fronto-occipital fasciculus) R |
|    |      |      | 0 |      |       |      |       |                                                                                        |
| 32 | 2231 | 0    |   | 0    | 0.00  | 0    | 0     | Sagittal stratum (inf. longitudinal fasciculus and inf. fronto-occipital fasciculus) L |
| 33 | 5611 | 0    | 0 | 337  | 6.01  | 194  | 3.46  | External capsule R                                                                     |
| 34 | 5587 | 0    | 0 | 0    | 0.00  | 134  | 2.40  | External capsule L                                                                     |
| 35 | 2342 | 37   | 0 | 4    | 0.17  | 339  | 14.47 | Cingulum (cingulate gyrus) R                                                           |
| 36 | 2751 | 69   | 0 | 0    | 0.00  | 61   | 2.22  | Cingulum (cingulate gyrus) L                                                           |
| 37 | 1236 | 0    | 0 | 0    | 0.00  | 0    | 0     | Cingulum (hippocampus) R                                                               |

|    |      |     |       |      |       |      |       |                                                                       |
|----|------|-----|-------|------|-------|------|-------|-----------------------------------------------------------------------|
| 38 | 1155 | 0   | 0     | 0    | 0.00  | 0    | 0     | Cingulum (hippocampus) L                                              |
| 39 | 1124 | 0   | 0     | 0    | 0.00  | 1    | 0.09  | Fornix (ces), Stria terminalis R                                      |
| 40 | 1125 | 0   | 0     | 0    | 0.00  | 0    | 0     | Fornix (ces), Stria terminalis L                                      |
| 41 | 6607 | 285 | 4.31  | 2106 | 31.88 | 4273 | 64.67 | Sup. longitudinal fasciculus R                                        |
| 42 | 6605 | 0   | 0.00  | 0    | 0.00  | 600  | 9.08  | Sup. longitudinal fasciculus L                                        |
| 43 | 507  | 0   | 0.00  | 338  | 66.67 | 407  | 80.28 | Sup. fronto-occipital fasciculus<br>R (part of ant. internal capsule) |
| 44 | 507  | 0   | 0.00  | 0    | 0.00  | 0    | 0     | Sup. fronto-occipital fasciculus<br>L (part of ant. internal capsule) |
| 45 | 380  | 0   | 0.00  | 0    | 0.00  | 0    | 0     | Uncinate fasciculus R                                                 |
| 46 | 376  | 0   | 0.00  | 0    | 0.00  | 0    | 0     | Uncinate fasciculus L                                                 |
| 47 | 596  | 199 | 33.39 | 378  | 63.42 | 363  | 60.91 | Tapetum R                                                             |
| 48 | 600  | 0   | 0.00  | 0    | 0.00  | 186  | 31.00 | Tapetum L                                                             |

---

Ant. = Anterior

Sup. = Superior

Post. = Posterior
